# Supplementary material for: The Impact of Sulfur-Containing Inorganic Compounds during the Depolymerization of Lignin by Hydrothermal Liquefaction of Black Liquor
Source: PubMed Central journal article supplement (PMC11000222; doi:10.1021/acs.energyfuels.3c04737), 2024-03-19
Supplement: ef3c04737_si_001.pdf [file ef3c04737_si_001.pdf]

## Supporting Information

### **The Impact of Sulfur-containing Inorganic Compounds during the Depolymerization of Lignin by Hydrothermal Liquefaction of Black Liquor**

*Maximilian Wörner (maximilian.woerner@kit.edu)\*<sup>†</sup>, Lukas Werner*

*(lukaswerner94@web.de)<sup>†</sup>, Ursel Hornung (ursel.hornung@kit.edu)<sup>†</sup>, Nicholas Islongo*

*Canabarro (nicholas.canabarro@sintef.no)<sup>‡</sup>, David Baudouin (david.baudouin@psi.ch)<sup>‡</sup>,*

*Nicolaus Dahmen (nicolaus.dahmen@kit.edu)<sup>†</sup>*

<sup>†</sup>Karlsruhe Institute of Technology (KIT), Institute of Catalysis Research and Development

(IKFT), Hermann-von-Helmholtz-Platz 1, 76344 Eggenstein-Leopoldshafen, Germany

<sup>‡</sup>Paul-Scherrer-Institute (PSI), Bioenergy and Catalysis Laboratory (LBK), Forschungsstrasse

111, 5232 Villigen, Switzerland

**Table S1.** Weighed-in masses of the compounds and volume of the NaOH/KOH solution for each

model liquor

|                                                     | <b>MBL-A</b> | <b>MBL-B</b> | <b>MBL-C</b> | <b>MBL-D</b> |
|-----------------------------------------------------|--------------|--------------|--------------|--------------|
| <b>Na<sub>2</sub>CO<sub>3</sub> / g</b>             | 1.777        | 1.778        | 1.778        | 1.781        |
| <b>K<sub>2</sub>CO<sub>3</sub> / g</b>              | 0.183        | 0.215        | 0.244        | 0.275        |
| <b>Na<sub>2</sub>SO<sub>3</sub> / g</b>             | 0.132        | 0.133        | 0.131        | 0.132        |
| <b>Na<sub>2</sub>SO<sub>4</sub> / g</b>             | 0.110        | 0.109        | 0.106        | 0.109        |
| <b>Na<sub>2</sub>S<sub>2</sub>O<sub>3</sub> / g</b> | 0.195        | 0.196        | 0.195        | 0.194        |
| <b>Na<sub>2</sub>S * 9 H<sub>2</sub>O / g</b>       | 0            | 0.785        | 1.573        | 2.363        |
| <b>Lignin / g</b>                                   | 9.001        | 8.998        | 8.998        | 9.002        |
| <b>NaOH/KOH solution /<br/>ml</b>                   | 8.75         | 7.5          | 6.25         | 5            |
| <b>HS<sup>-</sup> / g·l<sup>-1</sup></b>            | 0            | approx. 1    | approx. 2    | approx. 3    |

**Table S2.** Volumes of BL used at specific reaction temperatures  $T_R$

|          |              |              |         |        |
|----------|--------------|--------------|---------|--------|
| $T_R$    | 250 – 275 °C | 300 – 350 °C | 375 °C  | 400 °C |
| $V_{BL}$ | 17,5 ml      | 15 ml        | 12,5 ml | 5 ml   |

**Table S3.** Distribution coefficients for different catechols when using the described extraction procedure

| Component name   | Distribution coefficient $K_i$ |
|------------------|--------------------------------|
| Catechol         | 0.82                           |
| 3-Methylcatechol | 0.83                           |
| 4-Methylcatechol | 0.7                            |

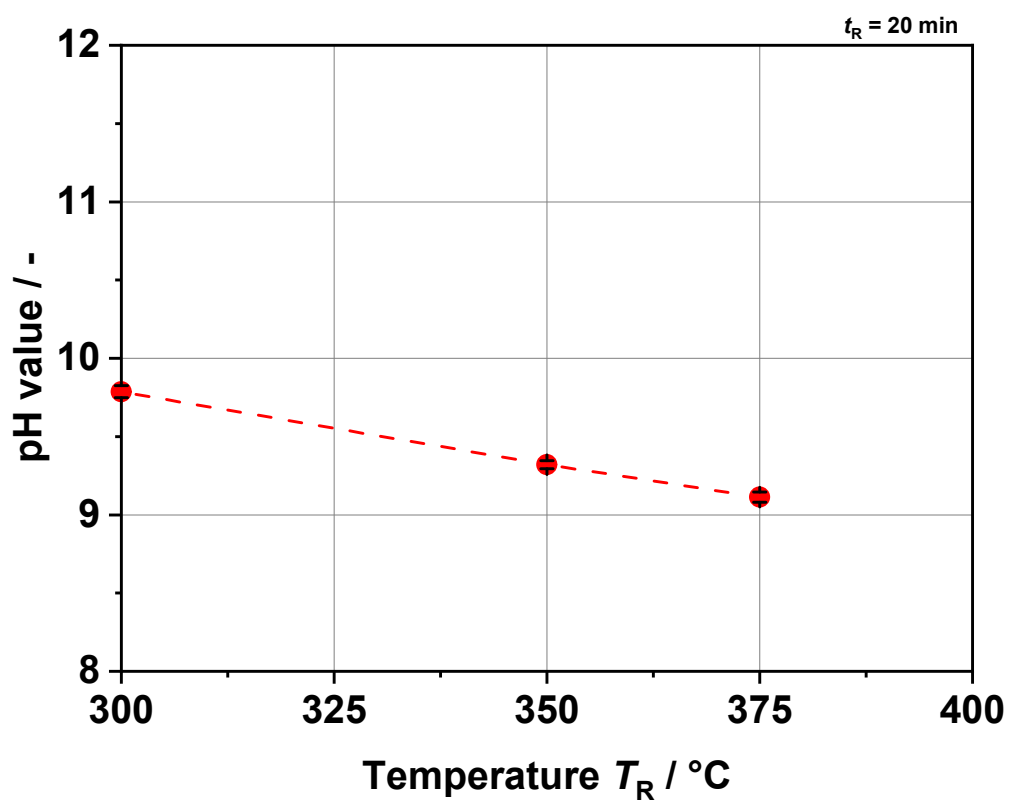

**Figure S1.** pH values for the liquid product after HTL of BL at three different reaction temperatures

$T_R$  (300 °C, 350 °C, 375 °C) and holding time  $t_R = 20$  min

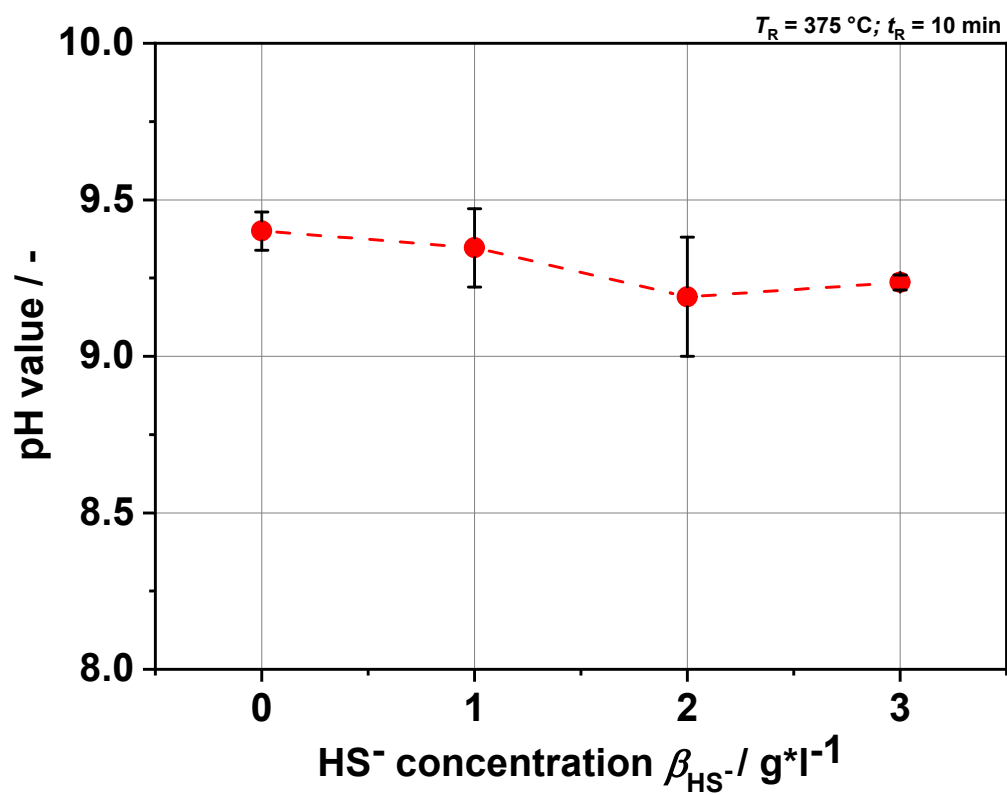

Figure S2. pH values for the liquid product after HTL of MBL at  $T_R = 375 \text{ }^\circ\text{C}$  and  $t_R = 10 \text{ min}$  with different HS<sup>-</sup> feedstock concentrations

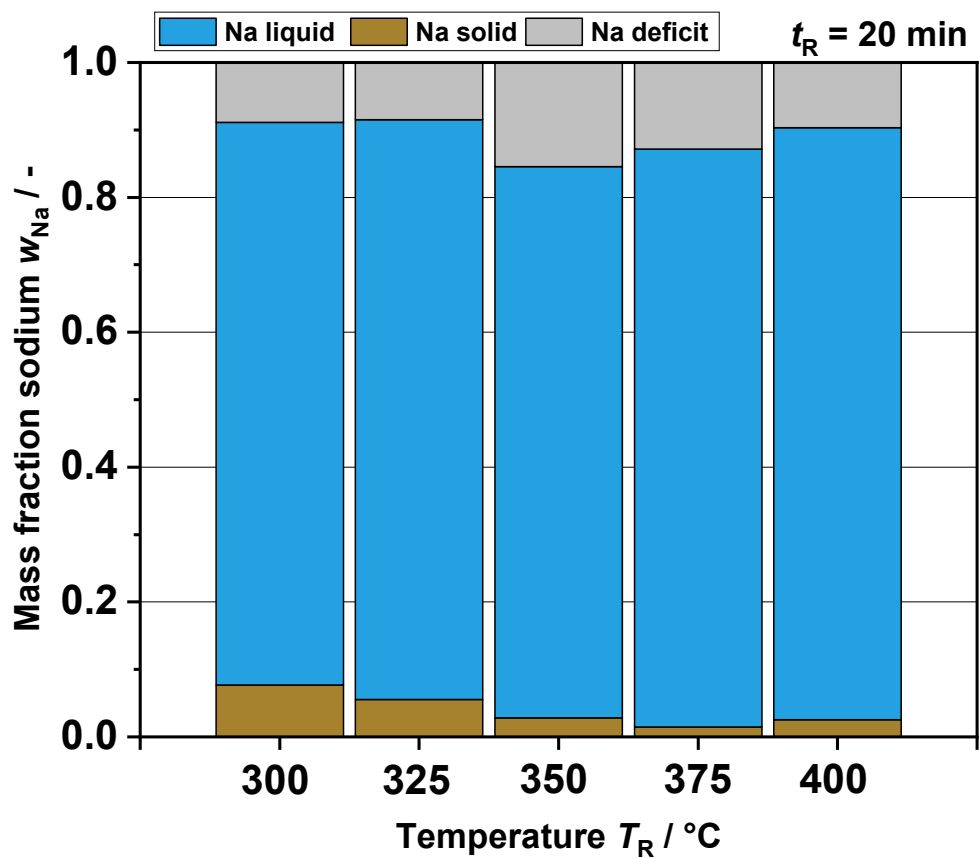

Figure S3. Sodium mass balance at different reaction temperatures  $T_R$

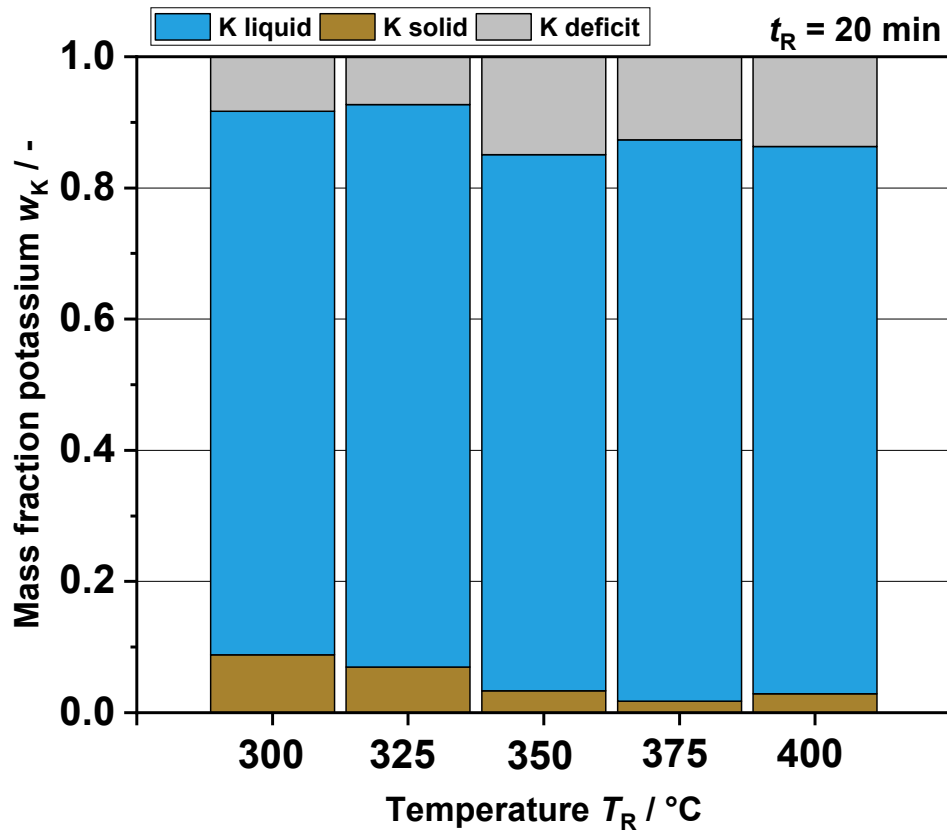

Figure S4. Potassium mass balance at different reaction temperatures  $T_R$
